# Supplementary material
Source: ML conference proceedings conference paper supplement (https://openreview.net/forum?id=pLsPFxqn7J)
Supplement: supplementary_material [file attachment]

These appendices provide additional background and elaborate on some of the finer points in the main text. In Appendix A we illustrate that cumulants have typically lower variance estimators compared to moments. Technical background on tensor products and tensor sums of Hilbert spaces, and on tensor algebras is provided in Appendix B. We present our proofs in Appendix C. In Appendix D additional details on our numerical experiments are provided. Our V-statistic based estimators are detailed in Appendix E.

## A Moments and Cumulants

Already for real-valued random variable  $X$ , moments have well-known drawbacks that make cumulants often preferable as statistics. For a detailed introduction to the use of cumulants in statistics we refer to McCullagh (2018). Here we just mention that

1. the moment generating function  $f(t) = \mathbb{E}[e^{tX}] = \sum_m \mu_m t^m / m!$  describes the law of  $X$  with sequence  $(\mu_m)$  of moments  $\mu_m = \mathbb{E}[X^m] \in \mathbb{R}$ . However, since the function  $t \mapsto f(t)$  is the expectation of an exponential, one would often expect that  $f$  is also "exponential in  $t$ ", hence  $g(t) = \log f(t) = \sum_m \kappa_m \frac{t^m}{m!}$  should be simpler to describe as a power series. For example, for a Gaussian  $f(t) = e^{t\mathbb{E}(X) + \frac{t^2}{2}\text{Var}(X)}$  and while  $\mu_m$  can be in this case explicitly calculated and uneven moments vanish, the  $m$ -moments are fairly complicated compared to the power series expansion of  $g(t) = \kappa_1 t + \kappa_2 \frac{t^2}{2}$  which just consists of  $\kappa_1$  (mean) and  $\kappa_2$  (variance).
2. In the moment sequence  $\mu_m$ , lower moments can dominate higher moments. Hence, a natural idea to compensate for these "different scales" is to systematically subtract lower moments from higher moments. As mentioned in the introduction, this is in particular troublesome if finite samples are available. Even in dimension  $d = 1$  the second moment is dominated by the squared mean, that is for a real-valued random variable  $X \sim \gamma$

$$\mu^2(\gamma) = (\mu^1(\gamma))^2 + \text{Var}(X),$$

where  $\text{Var}(X) := \mathbb{E}[(X - \mu^1(\gamma))^2]$ . It is well known that the minimum variance unbiased estimators for the variance are more efficient than that for the second moment: denoting them by  $\widehat{\mu^2}$  and  $\widehat{\kappa}$  respectively, one can show (Bonnier & Oberhauser, 2020) that given  $N$  samples from  $X$ , the following holds

$$\text{Var}(\widehat{\mu^2}) = \text{Var}(\widehat{\kappa}) + \frac{2}{N} \left[ (\mathbb{E}X)^4 - (\mathbb{E}X)^2 \text{Var}(X) - 2 \frac{\text{Var}(X)^2}{N-1} \right].$$

This means that when  $X$  has a large mean, it is more efficient to estimate its variance than its second moment since the last term in the above expression dominates. Hence, the variance  $\text{Var}(X)$  is typically a much more sensible second-order statistic than  $\mu^2(\gamma)$ . However, we emphasize that there are many other reasons why cumulants can have better properties as estimators

3. Cumulants characterize laws and the independence of two random variables manifests itself simply as vanishing of cross-cumulants. In view of the above item 2, this means for example that testing independence can be preferable in terms of vanishing cumulants rather than testing if moments factor  $\mathbb{E}[X^m Y^n] = \mathbb{E}[X^m] \mathbb{E}[Y^n]$ , and similarly for testing if distributions are the same.

The caveat to the above points is that it is not true that cumulants are always preferable. For example, there are distributions for which (a) the moment generating function is not naturally exponential in  $t$ , (b) lower moments do not dominate higher moments, (c) consequently independence or two-sample testing become worse with cumulants. While one can write down conditions under which for example, the variance of the kernelized cumulants is lower, the use of cumulants among statisticians is to simply regard cumulants as arising from natural motivations which leads to another estimator in their toolbox.

The main idea of our paper is simply that for the same reasons that cumulants can turn out to be powerful for real or vector-valued random variables, cumulants of RKHS-valued random variables are a natural choice of statistics. The situation is more complicated since it requires formalizing moment-

and cumulant-generating functions in RKHS but ultimately a kernel trick allows for circumventing the computational bottleneck of working in infinite dimensions and leads to computable estimators for independence and two-sample testing.

Further, we note that although cumulants are classic for vector-valued data, there seems to be not much work done about extending their properties to general structured data. Our kernelized cumulants apply to any set  $\mathcal{X}$  where a kernel is given. This includes many practically relevant examples such as strings (Lodhi et al., 2002), graphs (Kriege et al., 2020), or general sequentially ordered data (Király & Oberhauser, 2019; Chevyrev & Oberhauser, 2022); a survey of kernels for structured data is provided by Gärtner (2003).

## B Technical Background

In Section B.1 the tensor products  $(\bigotimes_{j=1}^d \mathcal{H}_j)$  and direct sums of Hilbert spaces  $(\bigoplus_{i \in I} \mathcal{H}_i)$  are recalled. Section B.2 is about tensor algebras over Hilbert spaces  $(\prod_{m \geq 0} \mathcal{H}^{\otimes m})$ .

### B.1 Tensor Products and Direct Sums of Banach and Hilbert Spaces

**Tensor products of Hilbert spaces.** For Hilbert spaces  $\mathcal{H}_1, \dots, \mathcal{H}_d$  and  $(h_1, \dots, h_d) \in \mathcal{H}_1 \times \dots \times \mathcal{H}_d$ , the multi-linear operator  $h_1 \otimes \dots \otimes h_d \in \mathcal{H}_1 \otimes \dots \otimes \mathcal{H}_d$  is defined as

$$(h_1 \otimes \dots \otimes h_d)(f_1, \dots, f_d) = \prod_{j=1}^d \langle h_j, f_j \rangle_{\mathcal{H}_j}$$

for all  $(f_1, \dots, f_d) \in \mathcal{H}_1 \times \dots \times \mathcal{H}_d$ . By extending the inner product

$$\langle a_1 \otimes \dots \otimes a_d, b_1 \otimes \dots \otimes b_d \rangle_{\mathcal{H}_1 \otimes \dots \otimes \mathcal{H}_d} := \prod_{j=1}^d \langle a_j, b_j \rangle_{\mathcal{H}_j}$$

to finite linear combinations of  $a_1 \otimes \dots \otimes a_d$ -s

$$\left\{ \sum_{i=1}^n c_i \otimes_{j=1}^d a_{i,j} : c_i \in \mathbb{R}, a_{i,j} \in \mathcal{H}_j, n \geq 1 \right\}$$

by linearity, and taking the topological completion one arrives at  $\mathcal{H}_1 \otimes \dots \otimes \mathcal{H}_d$ . Specifically, if  $(\mathcal{H}_1, k_1), \dots, (\mathcal{H}_d, k_d)$  are RKHSs, then so is  $\mathcal{H}_1 \otimes \dots \otimes \mathcal{H}_d = \mathcal{H}_{\otimes_{j=1}^d k_j}$  (Berlinet & Thomas-Agnan, 2004, Theorem 13) with the tensor product kernel

$$(\otimes_{j=1}^d k_j)((x_1, \dots, x_d), (x'_1, \dots, x'_d)) := \prod_{j=1}^d k_j(x_j, x'_j)$$

where  $(x_1, \dots, x_d), (x'_1, \dots, x'_d) \in \mathcal{X}_1 \times \dots \times \mathcal{X}_d$ .

**Tensor products of Banach spaces.** For Banach spaces  $\mathcal{B}_1, \dots, \mathcal{B}_d$ , the construction of  $\mathcal{B}_1 \otimes \dots \otimes \mathcal{B}_d$  is a little more involved (Lang, 2002) as one cannot rely on an inner product.

**Direct sums of Hilbert and Banach spaces.** Let  $(\mathcal{H}_i)_{i \in I}$  be Hilbert or Banach spaces where  $I$  is some index set. The direct sum of  $\mathcal{H}_i$ -s—written as  $\bigoplus_{i \in I} \mathcal{H}_i$ —consists of ordered tuples  $h = (h_i)_{i \in I}$  such that  $h_i \in \mathcal{H}_i$  for all  $i \in I$  and  $h_i = 0$  for all but a finite number of  $i \in I$ . Operations (addition, scalar multiplication) are performed coordinate-wise, and the inner product of  $a, b \in \bigoplus_{i \in I} \mathcal{H}_i$  is defined as  $\langle a, b \rangle_{\bigoplus_{i \in I} \mathcal{H}_i} = \sum_{i \in I} a_i b_i$ .

### B.2 Tensor Algebras

The tensor algebra  $T_j$  over a Hilbert space  $\mathcal{H}_j$  is defined as the topological completion of the space

$$\bigoplus_{m \geq 0} \mathcal{H}_j^{\otimes m}.$$

509 Note that it can equivalently be defined as the subset of  $(h_0, h_1, h_2, \dots) \in \prod_{m \geq 0} \mathcal{H}_j^{\otimes m}$  such that  
 510  $\sum_{m \geq 0} \|h_m\|_{\mathcal{H}_j^{\otimes m}}^2 < \infty$ , and as such it is a Hilbert space with norm

$$\|(h_0, h_1, h_2, \dots)\|_{\prod_{m \geq 0} \mathcal{H}_j^{\otimes m}}^2 = \sum_{m \geq 0} \|h_m\|_{\mathcal{H}_j^{\otimes m}}^2.$$

511  $\mathcal{T}_j$  is also an algebra, endowed with the tensor product over  $\mathcal{H}_j$  as its product. For  $a =$   
 512  $(a_0, a_1, a_2, a_2 \dots), b = (b_0, b_1, b_2, b_2 \dots) \in \mathcal{T}_j$ , their product can be written down in coordinates as

$$a \cdot b = \left( \sum_{i=0}^m a_i \otimes b_{m-i} \right)_{m \geq 0}.$$

513 For a sequence  $\mathcal{H}_1, \dots, \mathcal{H}_d$  of Hilbert spaces, we define

$$\mathcal{T} := \mathcal{T}_1 \otimes \dots \otimes \mathcal{T}_d,$$

514 where  $\mathcal{T}_j = \prod_{m \geq 0} \mathcal{H}_j^{\otimes m}$  ( $j = 1, \dots, d$ ). Let  $\mathcal{H} = \mathcal{H}_1 \times \dots \times \mathcal{H}_d$ , and recall that given a tuple of  
 515 integers  $\mathbf{i} = (i_1, \dots, i_d) \in \mathbb{N}^d$  we define  $\mathcal{H}^{\otimes \mathbf{i}} := \mathcal{H}_1^{\otimes i_1} \otimes \dots \otimes \mathcal{H}_d^{\otimes i_d}$ . This allows us to write down  
 516 a multi-grading for  $\mathcal{T}$  as

$$\mathcal{T} = \prod_{\mathbf{i} \in \mathbb{N}^d} \mathcal{H}^{\otimes \mathbf{i}}. \quad (8)$$

517 Note that this gives credence to us using multi-indices  $\mathbf{i} \in \mathbb{N}^d$  to describe elements of the tensor  
 518 algebra, as the multi-indices form its multi-grading.

519 Furthermore,  $\mathcal{T}$  is a multi-graded algebra when endowed with the (linear extension of the) following  
 520 multiplication defined on the components of  $\mathcal{T}$

$$\begin{aligned} \star : \mathcal{H}^{\otimes \mathbf{i}^1} \times \mathcal{H}^{\otimes \mathbf{i}^2} &\rightarrow \mathcal{H}^{\otimes (\mathbf{i}^1 + \mathbf{i}^2)}, \\ (x_1 \otimes \dots \otimes x_d) \star (y_1 \otimes \dots \otimes y_d) &= (x_1 \cdot y_1) \otimes \dots \otimes (x_d \cdot y_d), \end{aligned} \quad (9)$$

521 so that for  $a = (a^{\mathbf{i}})_{\mathbf{i} \in \mathbb{N}^d}, b = (b^{\mathbf{i}})_{\mathbf{i} \in \mathbb{N}^d} \in \mathcal{T}$ , their product can be written down as

$$(a \star b)^{\mathbf{i}} = \sum_{\mathbf{i}^1 + \mathbf{i}^2 = \mathbf{i}} a^{\mathbf{i}^1} \star b^{\mathbf{i}^2} \quad (10)$$

522 where addition of tuples  $\mathbf{i}^1, \mathbf{i}^2 \in \mathbb{N}^d$  is defined as  $\mathbf{i}^1 + \mathbf{i}^2 = (i_1^1 + i_1^2, \dots, i_d^1 + i_d^2)$ . With the degree  
 523 of a tuple defined as  $\deg(\mathbf{i}) = i_1 + \dots + i_d$ ,  $\mathcal{T}$  is also a graded algebra, with the grading written  
 524 down as

$$\mathcal{T} = \prod_{m \geq 0} \bigoplus_{\{\mathbf{i} \in \mathbb{N}^d : \deg(\mathbf{i}) = m\}} \mathcal{H}^{\otimes \mathbf{i}},$$

525 so that if one multiplies two elements together, the degree of their product is the sum of their degree.

526 Finally we note that  $\mathcal{T}$  is a unital algebra and the unit has the explicit form

$$(1, 0, 0, \dots),$$

527 i.e. the element consisting of only a 1 at degree 0.

## 528 C Proofs

529 This section is dedicated to proofs. The equivalence between the combinatorial expressions of cu-  
 530 mulants and the definition via a moment generating function is proved in Section C.2. The derivation  
 531 of our main results (Theorem 2 and Theorem 3) are detailed in Section C.3.

## 532 C.1 Equivalent Definitions of Cumulants in $\mathbb{R}^d$

533 Here we introduce a classical definition of cumulants via a moment generating function and its  
 534 equivalence to the combinatorial expressions. If  $X = (X_1, \dots, X_d)$  is an  $\mathbb{R}^d$ -valued random vari-  
 535 able distributed according to  $X \sim \gamma$ , then

$$\mu^{\mathbf{i}} = \mathbb{E}[X_1^{i_1} \dots X_d^{i_d}] \in \mathbb{R}$$

536 for  $\mathbf{i} = (i_1, \dots, i_d) \in \mathbb{N}^d$ . The following definition of the cumulants  $\kappa^{\mathbf{i}}(\gamma)$  of  $\gamma$  are equivalent

- 537 1.  $\sum_{\mathbf{i} \in \mathbb{N}^d} \kappa^{\mathbf{i}}(\gamma) \frac{\theta^{\mathbf{i}}}{\mathbf{i}!} = \log \sum_{\mathbf{i} \in \mathbb{N}^d} \mu^{\mathbf{i}}(\gamma) \frac{\theta^{\mathbf{i}}}{\mathbf{i}!},$
- 538 2.  $\kappa^{\mathbf{i}}(\gamma) = \sum_{\pi \in P(d)} c_{\pi} \prod_{\sigma \in \pi} \mu^{\mathbf{i}}(\sigma),$

539 where  $\theta = (\theta_1, \dots, \theta_d) \in \mathbb{R}^d$ ,  $c_{\pi} = (-1)^{|\pi|}(|\pi| - 1)!$  and the product  $\prod_{\sigma \in \pi}$  is over all the blocks  
 540  $\sigma \in (\pi_1, \dots, \pi_b)$  in the partition  $\pi = (\pi_1, \dots, \pi_b)$  of  $\{1, \dots, d\}$ . The equivalence between these  
 541 two definitions of cumulants, via a generating function and via their combinatorial definition, is  
 542 classic (McCullagh, 2018). This equivalence is also at the heart of many proofs about properties of  
 543 cumulants since some properties are easier to prove via one or the other definition.

## 544 C.2 Equivalent Definitions of Cumulants in RKHS

545 In the main text, we defined cumulants in RKHS by mimicking the combinatorial definition of cumu-  
 546 lants in  $\mathbb{R}^d$ . It is natural and useful to also have the analogous definition via a "generating function"  
 547 for RKHS-valued random variables. However, to generalize the definition via the logarithm of the  
 548 moment generating function to random variables in RKHS, requires to define a logarithm for tensor  
 549 series of moments. In this part, we show that this can be done and that indeed the two definitions  
 550 are equivalent.

551 We use the shorthand  $\kappa(\gamma) := \kappa_{k_1, \dots, k_d}(\gamma)$ ,  $\mu(\gamma) := \mu_{k_1, \dots, k_d}(\gamma)$ , and we overload the notation  
 552  $(X_1, \dots, X_d)$  with  $(k_1(\cdot, X_1), \dots, k_d(\cdot, X_d))$ . With this notation, we show that given coordinates  
 553  $\mathbf{i} \in \mathbb{N}^d$ , one may express the generalized cumulant  $\kappa^{\mathbf{i}}(\gamma)$  as either a combinatorial sum over mo-  
 554 ments indexed by partitions, or by using the cumulant generating function.

555 More specifically, we show that the generalized cumulant of a probability measure  $\gamma$  on  $\mathcal{H}_1 \times \dots \times$   
 556  $\mathcal{H}_d$  defined as

$$\kappa^{\mathbf{i}}(\gamma) = \sum_{\pi \in P(m)} c_{\pi} \mathbb{E}_{\gamma^{\mathbf{i}}_{\pi}}(X^{\otimes \mathbf{i}})$$

557 where  $c_{\pi} = (-1)^{|\pi|-1}(|\pi| - 1)!$  can also be expressed as coordinates in the tensorized logarithm of  
 558 the moment series. Motivated by the Taylor series expansion of the classic logarithm, we define

$$\log : \mathbb{T} \rightarrow \mathbb{T}, \quad x \mapsto \sum_{n \geq 1} \frac{(-1)^{n-1}}{n} (x - 1)^{\star n},$$

559 where  $\star$  denotes the product as defined in (9) and for  $t \in \mathbb{T}$ ,  $t^{\star n}$  is defined as

$$t^{\star n} = \underbrace{t \star \dots \star t}_{n \text{ - times}}$$

560 or coordinate-wise  $(t^{\star n})^{\mathbf{i}} = \sum_{\mathbf{i}^1 + \dots + \mathbf{i}^n = \mathbf{i}} t^{\mathbf{i}^1} \star \dots \star t^{\mathbf{i}^n}$  for  $\mathbf{i} \in \mathbb{N}^d$ . Note that unlike the classical  
 561 logarithm  $\log : \mathbb{R}_+ \rightarrow \mathbb{R}$ , the tensorized logarithm is defined on the whole space as a formal  
 562 expression.

563 **Generalized Cumulants as Logarithms** We want to show that the following holds

$$\kappa^{\mathbf{i}}(\gamma) = (\log \mu(\gamma^{\mathbf{i}}))^{\mathbf{1}_m}, \tag{11}$$

564 where  $\mathbf{1}_m = (1, \dots, 1) \in \mathbb{N}^m$ . By iterating (10) we can express (11) as

$$\sum_{j=1}^m \frac{(-1)^{j-1}}{j} \sum_{\mathbf{i}^1 + \dots + \mathbf{i}^j = \mathbf{1}_m} \mu^{\mathbf{i}^1}(\gamma^{\mathbf{i}^1}) \star \dots \star \mu^{\mathbf{i}^j}(\gamma^{\mathbf{i}^j}),$$

565 and our goal is to express this as a sum over partitions. We will use the notation  $[n] = \{1, \dots, n\}$ .  
 566 We can achieve our goal in two parts:

- 567 1. Show that for a fixed  $\mathbf{i} \in \mathbb{N}^d$  with  $\deg(\mathbf{i}) = m$  we can express (11) as a sum over all  
 568 surjective functions from  $[m]$  to  $[j]$ .  
 569 2. Show that this sum over functions reduces to a sum over partitions.

570 **Part 1.** Note that given  $\mathbf{i}^1 + \dots + \mathbf{i}^j = \mathbf{1}_m$  we may define  $h : [m] \rightarrow [j]$  by the relation  $(\mathbf{i}^{h(n)})_n = 1$ ,  
 571 that is, we take  $h(n)$  to be the index  $c$  for which the multi-index  $\mathbf{i}^c$  is 1 at  $n$ . Note that this function  
 572 is necessarily surjective since the sum is taken over non-zero multi-indices. Equivalently, for any  
 573 surjective function  $h : [m] \rightarrow [j]$  we may define multi-indices by setting

$$(\mathbf{i}^c)_n = \begin{cases} 1 & \text{if } n \in h^{-1}(c) \\ 0 & \text{otherwise} \end{cases}.$$

574 Note that any such multi-index will be non-zero since the function is assumed to be surjective. With  
 575 this identification we can write

$$(\log \mu(\gamma^{\mathbf{i}}))^{\mathbf{1}_m} = \sum_{j=1}^m \frac{(-1)^{j-1}}{j} \sum_{h:[m] \rightarrow [j]} \mu^{\mathbf{i}^{h^{-1}(1)}}(\gamma^{\mathbf{i}}) \star \dots \star \mu^{\mathbf{i}^{h^{-1}(j)}}(\gamma^{\mathbf{i}}).$$

576 **Part 2.** Recall that given a function  $h : [m] \rightarrow [j]$  we can associate it to its corresponding par-  
 577 tition  $\pi_h \in \mathcal{P}(m)$  by considering the set  $\{h^{-1}(1), \dots, h^{-1}(j)\}$ , and there are exactly  $j!$  different  
 578 functions corresponding to a given partition, which are given by re-ordering the values  $1, \dots, j$ .  
 579 This reordering of the blocks does not change the summands since the marginals of the partition  
 580 measure are always copies of each other and hence self-commute, hence a product of moments like  
 581  $\mu^{\mathbf{i}^{h^{-1}(1)}}(\gamma^{\mathbf{i}}) \star \dots \star \mu^{\mathbf{i}^{h^{-1}(j)}}(\gamma^{\mathbf{i}})$  can always be written as  $\mu^{\mathbf{i}}(\gamma_{\pi_h}^{\mathbf{i}})$ , the  $\mathbf{i}$ -th coordinate of the moment  
 582 sequence of the partition measure  $\gamma_{\pi_h}^{\mathbf{i}}$ . With this in mind we can write

$$\begin{aligned} (\log \mu(\gamma^{\mathbf{i}}))^{\mathbf{1}_m} &= \sum_{j=1}^m \frac{(-1)^{j-1}}{j} \sum_{h:[m] \rightarrow [j]} \mu^{\mathbf{i}}(\gamma_{\pi_h}^{\mathbf{i}}) = \sum_{\pi \in P(m)} \frac{(-1)^{|\pi|-1}}{|\pi|} |\pi|! \mu^{\mathbf{i}}(\gamma_{\pi}^{\mathbf{i}}) \\ &= \sum_{\pi \in P(m)} c_{\pi} \mu^{\mathbf{i}}(\gamma_{\pi}^{\mathbf{i}}) = \sum_{\pi \in P(m)} c_{\pi} \mathbb{E}_{\gamma_{\pi}^{\mathbf{i}}} (X^{\otimes \mathbf{i}}). \end{aligned}$$

583 From this it immediately follows that for two probability measures  $\gamma, \eta$  we can write

$$\begin{aligned} \langle \kappa^{\mathbf{i}}(\gamma), \kappa^{\mathbf{i}}(\eta) \rangle_{\mathcal{H}^{\otimes \mathbf{i}}} &= \left\langle \sum_{\pi \in P(m)} c_{\pi} \mathbb{E}_{\gamma_{\pi}^{\mathbf{i}}} (X^{\otimes \mathbf{i}}), \sum_{\tau \in P(m)} c_{\tau} \mathbb{E}_{\eta_{\tau}^{\mathbf{i}}} (Y^{\otimes \mathbf{i}}) \right\rangle_{\mathcal{H}^{\otimes \mathbf{i}}} \\ &= \sum_{\pi, \tau \in P(m)} c_{\pi} c_{\tau} \mathbb{E}_{(X, Y) \sim \gamma_{\pi}^{\mathbf{i}} \otimes \eta_{\tau}^{\mathbf{i}}} \langle X^{\otimes \mathbf{i}}, Y^{\otimes \mathbf{i}} \rangle_{\mathcal{H}^{\otimes \mathbf{i}}}. \end{aligned}$$

584 Lemma 1 then follows from the definition of the tensor products.

### 585 C.3 Proof of Theorem 2 and Theorem 3

586 In this section we present the proofs of Theorem 2 and Theorem 3. We do this in a slightly more  
 587 abstract setting where the feature maps take values in Banach spaces for clarity, until the end when  
 588 we again restrict our attention to RKHSs. We start out by showing that polynomial functions of  
 589 the feature maps characterize measures (Lemma 4). From there it is straightforward to show that  
 590 cumulants have the same property (Theorem 4), and lastly that this also holds when working directly  
 591 with the kernels (Proposition 1).

592 A *monomial* on separable Banach spaces  $\mathcal{B}_1, \dots, \mathcal{B}_d$  is any expression of the form

$$M(x_1, \dots, x_d) = \prod_{j=1}^{i_1} \langle f_j^1, x_1 \rangle \cdots \prod_{j=1}^{i_d} \langle f_j^d, x_d \rangle$$

593 for some  $(i_1, \dots, i_d) \in \mathbb{N}^d$ , where  $f_j^i \in \mathcal{B}_i^*$  are elements of the dual space  $\mathcal{B}_i^*$  and  $x_i \in \mathcal{B}_i$ .<sup>5</sup> Finite  
 594 linear combinations of monomials are called the *polynomials*. Recall that a set of functions  $F$  on  
 595 a set  $S$  is said to *separate the points* of  $S$  if for every  $x \neq y \in S$  there exists  $f \in F$  such that  
 596  $f(x) \neq f(y)$ .

<sup>5</sup>These monomials naturally extend the classical ones.

597 **Lemma 4** (Polynomial functions of feature maps characterize probability measures). *Let*  
 598  $\mathcal{X}_1, \dots, \mathcal{X}_d$  *be Polish spaces,  $\mathcal{B}_1, \dots, \mathcal{B}_d$  separable Banach spaces and  $\varphi_i : \mathcal{X}_i \rightarrow \mathcal{B}_i$  be contin-*  
 599 *uous, bounded, and injective functions. Then the set of functions on the Borel probability measures*  
 600  $\mathcal{P}\left(\prod_{i=1}^d \mathcal{X}_i\right)$  *of  $\prod_{i=1}^d \mathcal{X}_i$*

$$\mathcal{P}\left(\prod_{i=1}^d \mathcal{X}_i\right) \rightarrow \mathbb{R}, \quad \gamma \mapsto \int_{\prod_{i=1}^d \mathcal{X}_i} p(\varphi_1(x_1), \dots, \varphi_d(x_d)) d\gamma(x_1, \dots, x_d),$$

601 *where  $p$  ranges over all polynomials, separates the points of  $\mathcal{P}\left(\prod_{i=1}^d \mathcal{X}_i\right)$ .*

602 *Proof.* We first show that the pushforward map

$$\prod_{i=1}^d \varphi_i : \mathcal{P}\left(\prod_{i=1}^d \mathcal{X}_i\right) \rightarrow \mathcal{P}\left(\prod_{i=1}^d \mathcal{B}_i\right)$$

603 is injective. This is done in two parts, first we show that every Borel measure on  $\prod_{i=1}^d \mathcal{X}_i$  is a  
 604 Radon measure, then we show that the pushforward map is injective on Radon measures. To see the  
 605 first part, note that since  $\mathcal{X}_1, \dots, \mathcal{X}_d$  are Polish spaces, so is their product space  $\prod_{i=1}^d \mathcal{X}_i$  (Dudley  
 606 2004, Theorem 2.5.7; Willard 1970, Theorem 16.4c), and since Borel measures on Polish spaces are  
 607 Radon measures (Bogachev, 2007, Theorem 7.1.7), any  $\gamma \in \mathcal{P}(\prod_{i=1}^d \mathcal{X}_i)$  must be a Radon measure.

608 For the second part, note that

$$\prod_{i=1}^d \varphi_i : \prod_{i=1}^d \mathcal{X}_i \rightarrow \prod_{i=1}^d \mathcal{B}_i, \quad \left(\prod_{i=1}^d \varphi_i\right)(x_1, \dots, x_d) \mapsto \prod_{i=1}^d \varphi_i(x_i)$$

609 is a norm bounded, continuous injection. Since  $\prod_{i=1}^d \mathcal{B}_i$  is a Hausdorff space,  $\prod_{i=1}^d \varphi_i$  is a homeo-  
 610 morphism on compacts since continuous injections into Hausdorff spaces are homeomorphisms on  
 611 compacts (Rudin, 1953, Theorem 4.17). Let  $\mu, \nu \in \mathcal{P}\left(\prod_{i=1}^d \mathcal{X}_i\right)$  be two Radon measures such that  
 612 their pushforwards are the same  $\prod_{i=1}^d \varphi_i(\mu) = \prod_{i=1}^d \varphi_i(\nu)$ , then for any compact  $C \subseteq \prod_{i=1}^d \mathcal{X}_i$  we  
 613 have  $\mu(C) = \nu(C)$  as  $\prod_{i=1}^d \varphi_i : C \rightarrow \prod_{i=1}^d \varphi_i(C)$  is a homeomorphism. Since Radon measures  
 614 are characterized by their values on compacts, this implies that  $\mu = \nu$ . Hence the pushforward map  
 615 is injective.

616 Denote by  $K$  the image of  $\prod_{i=1}^d \mathcal{X}_i$  under the mapping  $\prod_{i=1}^d \varphi_i$  in  $\prod_{i=1}^d \mathcal{B}_i$ . Note that  $K$  is a  
 617 bounded Polish space. It is enough to show that the polynomials separate the points of  $\mathcal{P}(K)$ . To  
 618 see this, note that the polynomials form an algebra of continuous functions that separate the points of  
 619  $\prod_{i=1}^d \mathcal{B}_i$ , and when restricted to  $K$  they are bounded, since  $K$  is norm bounded. Since  $K$  is Polish,  
 620 any Borel measure is Radon, and we can apply the Stone-Weierstrass theorem for Radon measures  
 621 (Bogachev, 2007, Exercise 7.14.79) to get the assertion.  $\square$

622 In what follows we will use the following index notation for linear functionals. Fix some tuple  
 623  $\mathbf{i} = (i_1, \dots, i_d) \in \mathbb{N}^d$  with  $\deg(\mathbf{i}) = m$ . Given separable Banach spaces  $\mathcal{B}_1, \dots, \mathcal{B}_d$  we use the  
 624 notation

$$\mathcal{B}^{\otimes \mathbf{i}} := \mathcal{B}_1^{\otimes i_1} \otimes \dots \otimes \mathcal{B}_d^{\otimes i_d}$$

625 and given an element  $x = (x_1, \dots, x_d) \in \prod_{i=1}^d \mathcal{B}_i$  we write  $x^{\mathbf{i}} := x_1^{\otimes i_1} \otimes \dots \otimes x_d^{\otimes i_d}$  so that  
 626  $x^{\mathbf{i}} \in \mathcal{B}^{\otimes \mathbf{i}}$ . If we have functions  $(\varphi_i)_{i=1}^d$  such that  $\varphi_i : \mathcal{X}_i \rightarrow \mathcal{B}_i$  on some Polish spaces  $\mathcal{X}_1, \dots, \mathcal{X}_d$ ,  
 627 then we write

$$\varphi^{\otimes \mathbf{i}} := \varphi_1^{\otimes i_1} \otimes \dots \otimes \varphi_d^{\otimes i_d}, \quad \varphi^{\otimes \mathbf{i}} : \prod_{i=1}^d \mathcal{X}_i \rightarrow \mathcal{B}^{\otimes \mathbf{i}}.$$

628 Given a collection of linear functionals  $F \in \prod_{j=1}^d (\mathcal{B}_j^*)^{i_j}$  such that  $F = (f_1, \dots, f_d)$  we write

$$F^{\otimes \mathbf{i}} := f_1 \otimes \dots \otimes f_d, \quad F^{\otimes \mathbf{i}} \in (\mathcal{B}^{\otimes \mathbf{i}})^*.$$

629 Note the following trick: the monomials on  $\prod_{i=1}^d \mathcal{B}_i$  are exactly functions of the form

$$x \mapsto \langle F^{\otimes \mathbf{i}}, x^{\mathbf{i}} \rangle$$

630 for  $F = (f_1, \dots, f_d)$ , this will be used in the proofs. We can now restate and prove our theorem.  
 631 Note that the cumulants here are defined like in Definition 4 which is a sensible definition even if  
 632 the feature maps are not associated to kernels.

633 **Theorem 4** (Generalization of Theorem 2 and Theorem 3). *Let  $\mathcal{X}_1, \dots, \mathcal{X}_d$  be Polish spaces and*  
 634  *$\varphi_i : \mathcal{X}_i \rightarrow \mathcal{B}_i$  be continuous, bounded and injective feature maps into separable Banach spaces  $\mathcal{B}_i$*   
 635 *for  $i = 1, \dots, d$ . Let  $\gamma$  and  $\eta$  be probability measures on  $\mathcal{X}_1 \times \dots \times \mathcal{X}_d$ . Then*

- 636 1.  $\gamma = \eta$  if and only if  $\kappa(\gamma) = \kappa(\eta)$ .
- 637 2.  $\gamma = \bigotimes_{i=1}^d \gamma|_{\mathcal{X}_i}$  if and only if the cross cumulants vanish, that is  $\kappa^{\mathbf{i}}(\gamma) = 0$  for all  $\mathbf{i} \in \mathbb{N}_+^d$ .

638 *Proof.*

639 • Item 2: We want to show that the cross cumulants vanish if and only if  $\gamma = \bigotimes_{i=1}^d \gamma|_{\mathcal{X}_i}$ . By  
 640 Lemma 4 it is enough to show that

$$\mathbb{E}_\gamma \left[ p(\varphi_1(X_1), \dots, \varphi_d(X_d)) \right] = \mathbb{E}_{\bigotimes_{i=1}^d \gamma|_{\mathcal{X}_i}} \left[ p(\varphi_1(X_1), \dots, \varphi_d(X_d)) \right]$$

641 for any monomial function  $p$ . Let us take linear functionals  $F = (f_1, \dots, f_d)$  and note that

$$\langle F^{\mathbf{i}}, \kappa^{\mathbf{i}}(\gamma) \rangle = \sum_{\pi \in P(d)} c_\pi \mathbb{E}_{\gamma_\pi^{\mathbf{i}}} [f_1(\varphi_1(X_1)) \cdots f_d(\varphi_d(X_d))]$$

642 which is the classical cumulant of the vector-valued random variable

$$((f_1 \circ \varphi_1)(X_1), \dots, (f_d \circ \varphi_d)(X_d)),$$

643 where  $(X_1, \dots, X_d) \sim \gamma$ . Hence by classical results (Speed, 1983), all cross cumulants of  $((f_1 \circ$   
 644  $\varphi_1)(X_1), \dots, (f_d \circ \varphi_d)(X_d))$  vanish if and only if the cross moments split, that is to say

$$\mathbb{E}_\gamma \left[ p((f_1 \circ \varphi_1)(X_1), \dots, (f_d \circ \varphi_d)(X_d)) \right] = \mathbb{E}_{\bigotimes_{i=1}^d \gamma|_{\mathcal{X}_i}} \left[ p((f_1 \circ \varphi_1)(X_1), \dots, (f_d \circ \varphi_d)(X_d)) \right]$$

645 for any monomial  $p$  on  $\mathbb{R}^d$ . Since  $f_1, \dots, f_d$  were arbitrary this holds for all monomials, which  
 646 shows the assertion.

647 • Item 1: By assumption  $\kappa^{\mathbf{i}}(\gamma) = \kappa^{\mathbf{i}}(\eta)$  for every  $\mathbf{i} \in \mathbb{N}^d$ ; this implies that  $\mathbb{E}_\gamma p(\varphi_1, \dots, \varphi_d) =$   
 648  $\mathbb{E}_\eta p(\varphi_1, \dots, \varphi_d)$  for any polynomial  $p$ , so we can apply Lemma 4.  $\square$

649 **Proposition 1** (Theorem 2 and Theorem 3). *Let  $\mathcal{X}_1, \dots, \mathcal{X}_d$  be Polish spaces and  $k_i : \mathcal{X}_i^2 \rightarrow \mathbb{R}$  be a*  
 650 *collection of bounded, continuous, point-separating kernels. Let  $\gamma$  and  $\eta$  be probability measures*  
 651 *on  $\mathcal{X}_1 \times \dots \times \mathcal{X}_d$ . Then*

- 652 1.  $\gamma = \eta$  if and only if  $\kappa_{k_1, \dots, k_d}(\gamma) = \kappa_{k_1, \dots, k_d}(\eta)$ .
- 653 2.  $\gamma = \bigotimes_{i=1}^d \gamma|_{\mathcal{X}_i}$  if and only if  $\kappa_{k_1, \dots, k_d}^{\mathbf{i}}(\gamma) = 0$  for all  $\mathbf{i} \in \mathbb{N}_+^d$ .

654 *Proof.* We reduce the proof to the checking of the conditions of Theorem 4. Let  $\varphi_i$  denote  
 655 the canonical feature map of the kernel  $k_i$ , and let  $\mathcal{B}_i := \mathcal{H}_{k_i}$  be the RKHS associated to  $k_i$   
 656 ( $i \in \{1, \dots, d\}$ ). For all  $i \in \{1, \dots, d\}$ ,  $\varphi_i$  is (i) bounded by the boundeness of  $k_i$  since  
 657  $\|\varphi_i(x)\|_{\mathcal{H}_{k_i}}^2 = k_i(x, x) \leq \sup_{x \in \mathcal{X}_i} |k_i(x, x)| < \infty$ , (ii) continuous by the continuity of  $k_i$  (Stein-  
 658 wart & Christmann, 2008, Lemma 4.29), (iii) injective by the point-separating property of  $k_i$ . The  
 659 separability of  $\mathcal{H}_{k_i}$  follows (Steinwart & Christmann, 2008, Lemma 4.33) from the separability of  
 660  $\mathcal{X}_i$  and the continuity of  $k_i$  ( $i \in \{1, \dots, d\}$ ). Note: Details on the expected kernel trick part of  
 661 Theorem 2 and Theorem 3 are provided in Section E.  $\square$

## D Additional Experiments and Details

Here we give additional details on the experiments that were performed, and discuss some further experiments that did not fit into the main text.

**Background on permutation testing.** Permutation testing works by bootstrapping the distribution of a test statistic under the null hypothesis. This allows the user to estimate confidence intervals under the null, which is a powerful all-purpose way of doing so when analytic expressions are unavailable. As an example, assume we have two probability measures  $\gamma, \eta$  on  $\mathcal{X}$  with i.i.d. samples  $x_1, \dots, x_N \sim \gamma, y_1, \dots, y_N \sim \eta$ . If the null hypothesis is that  $\gamma = \eta$  then we may set

$$(z_1, \dots, z_{2N}) := (x_1, \dots, x_N, y_1, \dots, y_N)$$

so that for any permutation  $\sigma$  on  $2N$  elements, we get two different set of of i.i.d. samples from  $\gamma = \eta$  by using the empirical measures

$$\tilde{\gamma}_\sigma := (z_{\sigma(1)}, \dots, z_{\sigma(N)}), \quad \tilde{\eta}_\sigma := (z_{\sigma(N+1)}, \dots, z_{\sigma(2N)})$$

and for any statistic  $S : \mathcal{P}(\mathcal{X})^2 \rightarrow \mathbb{R}$ , we may estimate  $S(\gamma, \eta)$  under the null by sampling from  $S(\tilde{\gamma}_\sigma, \tilde{\eta}_\sigma)$ . If the null hypothesis were true, we might expect  $S(\gamma, \eta)$  to lie in a region with high probability of the permutation estimator, and we can use this as a criteria for rejecting the null. Under fairly weak assumptions, this yields a test at the appropriate level (Chung & Romano, 2013).

**Comparing a uniform and a mixture.** Any uniform random variable over a symmetric interval will have 0 mean and skewness, so a symmetric mixture only needs to match the variance. If  $X$  is a 50/50 mixture of  $U[a, b]$  and  $U[-a, -b]$  then

$$\text{Var}(X) = \frac{2}{3} (b^2 + ba + a^2)$$

so if  $Y$  is distributed according to  $U[-c, c]$  then we only need to solve

$$b^2 + ba + a^2 = c^2$$

which is straightforward for a given  $a$  and  $c$ .

**Computational complexity of estimators.** The V-statistic for  $d^{(2)}$  as written in Lemma 2 is bottlenecked by the matrix multiplications. We may note however that for two matrices  $\mathbf{A}, \mathbf{B}$  it holds that

$$\text{Tr}(\mathbf{A}^\top \mathbf{B}) = \langle \mathbf{A} \circ \mathbf{B} \rangle,$$

where  $\langle \cdot \rangle$  denotes the sum over elements and  $\circ$  denotes the Hadamard product. We also note that for  $\mathbf{H}_n = \frac{1}{n} \mathbf{1}_n \mathbf{1}_n^\top$  we have  $(\mathbf{A} \mathbf{H}_n)_{i,j} = \frac{1}{n} \sum_{c=1}^n A_{i,c}$ . Using both of these tricks we may compute both  $d^{(2)}$  and CSIC without any matrix multiplications, which brings the computational complexity down to  $O(N^2)$  for both. For a comparison of actual computation time, see Fig. 6 and Fig. 7, where the average computational times for our methods are compared to the KME and HSIC for  $N$  between 50 and 2000.

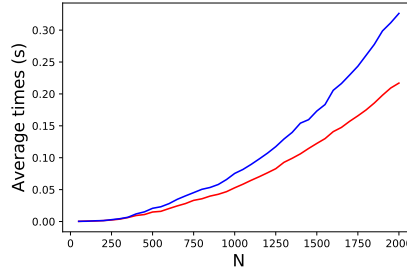

Figure 6: Average computational time in seconds for KME (red) and  $d^{(2)}$  (blue) for sample size  $N$  between 50 and 2000.

**Type I error on the Seoul Bicycle data.** The results when comparing the winter data to itself is presented in Fig. 8. As we see the performance is similar for both estimators and lies between 5 and 10%.



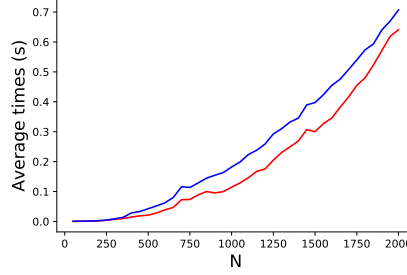

Figure 7: Average computational time in seconds for HSIC (red) and CSIC (blue) for sample size  $N$  between 50 and 2000.

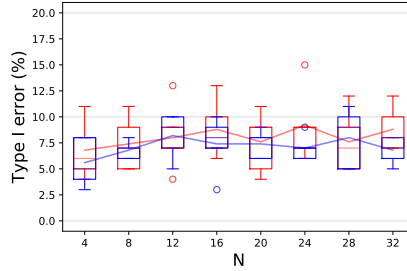

Figure 8: Type I errors using MMD (red) and  $d^{(2)}$  (blue) on the Seoul bicycle data set.

686 **Classical vs. kernelized cumulants.** Using the same distributions as in the synthetic independence  
687 testing experiment, we now compare  $X$  with  $Y_{0.5}^2$  to contrast independence testing with classical  
688 cumulants with their kernelized counterpart. The results are summarized in Table 1 where they  
689 are displayed as the median value  $\pm$  half the difference between the 75th and 25th percentile. We  
690 consider every combination of classical vs. kernelized, variance vs. skewness, and two different  
691 sample sizes. One can observe that the classical variance based test performs poorly compared to a  
692 classical skewness test, the kernelized variance test is almost as powerful as the kernelized skewness  
693 test, and in all cases the kernelized tests deliver higher power.

## 694 E Kernel Trick Computations

695 Here we show how to arrive at the expressions used for the V-statistics used in the experiments.

696 Given a real analytic function  $f(x, \dots, x_d) = \sum_{\mathbf{i} \in \mathbb{N}^d} f_{\mathbf{i}} x^{\mathbf{i}}$  in  $m$  variables with nonzero radius of  
697 convergence and Hilbert spaces  $\mathcal{H}_1, \dots, \mathcal{H}_d$  we may (formally) extend  $f$  to a function

$$f_{\otimes} : \prod_{i=1}^d \mathcal{H}_i \rightarrow \mathbb{T}, \quad f_{\otimes}(x_1, \dots, x_d) = \prod_{\mathbf{i} \in \mathbb{N}^d} f_{\mathbf{i}} x^{\otimes \mathbf{i}}.$$

698 Moreover, if the Hilbert spaces are RKHSs then we have the following result.

699 **Lemma 5** (Nonlinear kernel trick). *For any collection of RKHSs  $\mathcal{H}_1, \dots, \mathcal{H}_d$  with feature maps*  
700  *$\varphi_i : \mathcal{X}_i \rightarrow \mathcal{H}_i$ , assume that  $f$  and  $g$  are real analytic functions with radii of convergence  $r(f)$  and*

Table 1: Comparison of classical and kernelized cumulants for independence testing with both variance and skewness.

| N=20       | Variance       | Skewness       | N=30       | Variance       | Skewness       |
|------------|----------------|----------------|------------|----------------|----------------|
| Classical  | 19% $\pm$ 3.0% | 56% $\pm$ 3.5% | Classical  | 17% $\pm$ 0.5% | 68% $\pm$ 1.0% |
| Rbf kernel | 39% $\pm$ 4.5% | 59% $\pm$ 3.0% | Rbf kernel | 65% $\pm$ 3.5% | 79% $\pm$ 1.5% |

701  $r(g)$  such that  $\max_{1 \leq i \leq d} \sup_{x \in \mathcal{X}_i} |\varphi_i(x)| < \min(r(f), r(g))$ . Then

$$\langle f_{\otimes}(\varphi_1(x_1), \dots, \varphi_d(x_d)), g_{\otimes}(\varphi_1(y_1), \dots, \varphi_d(y_d)) \rangle_{\mathcal{T}} = \sum_{\mathbf{i} \in \mathbb{N}^d} f_{\mathbf{i}} g_{\mathbf{i}} k_1(x_1, y_1)^{i_1} \dots k_d(x_d, y_d)^{i_d}.$$

702 *Proof.* Since the image of the  $\varphi_i$ s lie inside the radius of convergence of  $f_{\otimes}$  and  $g_{\otimes}$  the power series  
703 converge absolutely and we can write

$$\begin{aligned} \langle f_{\otimes}(\varphi^{\otimes \mathbf{i}}(x^{\mathbf{i}})), g_{\otimes}(\varphi^{\otimes \mathbf{i}}(y^{\mathbf{i}})) \rangle_{\mathcal{T}} &= \langle \sum_{\mathbf{i} \in \mathbb{N}^d} f_{\mathbf{i}} \varphi^{\otimes \mathbf{i}}(x^{\mathbf{i}}), \sum_{\mathbf{i} \in \mathbb{N}^d} g_{\mathbf{i}} \varphi^{\otimes \mathbf{i}}(y^{\mathbf{i}}) \rangle_{\mathcal{T}} \\ &= \sum_{\mathbf{i} \in \mathbb{N}^d} f_{\mathbf{i}} g_{\mathbf{i}} \langle \varphi^{\otimes \mathbf{i}}(x^{\mathbf{i}}), \varphi^{\otimes \mathbf{i}}(y^{\mathbf{i}}) \rangle_{\mathcal{H}^{\otimes \mathbf{i}}} = \sum_{\mathbf{i} \in \mathbb{N}^d} f_{\mathbf{i}} g_{\mathbf{i}} k_1(x_1, y_1)^{i_1} \dots k_d(x_d, y_d)^{i_d}, \end{aligned}$$

704 where  $\mathcal{H} = \mathcal{H}_1 \times \dots \times \mathcal{H}_d$ . □

705 Using Lemma 5, we can choose kernels  $k_i : \mathcal{X}_i^2 \rightarrow \mathbb{R}$  with associated RKHSs  $\mathcal{H}_i$  and feature maps  
706  $\varphi_i$  and some  $\mathbf{i} \in \mathbb{N}^d$  with  $\deg(\mathbf{i}) = m$ . We make the observation that with  $X = (X_1, \dots, X_d) \sim \gamma$ ,  
707  $Y = (Y_1, \dots, Y_d) \sim \eta$  and  $k^{\otimes \mathbf{i}}$  and  $\mathcal{H}^{\otimes \mathbf{i}}$  as in (4), one has

$$\begin{aligned} \langle \kappa^{\mathbf{i}}(\gamma), \kappa^{\mathbf{i}}(\eta) \rangle_{\mathcal{H}^{\otimes \mathbf{i}}} &= \langle \sum_{\pi \in P(m)} c_{\pi} \mathbb{E}_{\gamma_{\pi}^{\mathbf{i}}} \varphi^{\otimes \mathbf{i}}(X^{\mathbf{i}}), \sum_{\tau \in P(m)} c_{\tau} \mathbb{E}_{\eta_{\tau}^{\mathbf{i}}} \varphi^{\otimes \mathbf{i}}(Y^{\mathbf{i}}) \rangle_{\mathcal{H}^{\otimes \mathbf{i}}} \\ &= \sum_{\pi, \tau \in P(m)} c_{\pi} c_{\tau} \langle \mathbb{E}_{\gamma_{\pi}^{\mathbf{i}}} \varphi^{\otimes \mathbf{i}}(X^{\mathbf{i}}), \mathbb{E}_{\eta_{\tau}^{\mathbf{i}}} \varphi^{\otimes \mathbf{i}}(Y^{\mathbf{i}}) \rangle_{\mathcal{H}^{\otimes \mathbf{i}}} \\ &= \sum_{\pi, \tau \in P(m)} c_{\pi} c_{\tau} \mathbb{E}_{\gamma_{\pi}^{\mathbf{i}} \otimes \eta_{\tau}^{\mathbf{i}}} \langle \varphi^{\otimes \mathbf{i}}(X^{\mathbf{i}}), \varphi^{\otimes \mathbf{i}}(Y^{\mathbf{i}}) \rangle_{\mathcal{H}^{\otimes \mathbf{i}}} \\ &= \sum_{\pi, \tau \in P(m)} c_{\pi} c_{\tau} \mathbb{E}_{\gamma_{\pi}^{\mathbf{i}} \otimes \eta_{\tau}^{\mathbf{i}}} k^{\otimes \mathbf{i}}((X_1, \dots, X_m), (Y_1, \dots, Y_m)), \end{aligned}$$

708 Since

$$\begin{aligned} \|\kappa^{\mathbf{i}}(\gamma)\|_{\mathcal{H}^{\otimes \mathbf{i}}}^2 &= \langle \kappa^{\mathbf{i}}(\gamma), \kappa^{\mathbf{i}}(\gamma) \rangle_{\mathcal{H}^{\otimes \mathbf{i}}} \\ \|\kappa^{\mathbf{i}}(\gamma) - \kappa^{\mathbf{i}}(\eta)\|_{\mathcal{H}^{\otimes \mathbf{i}}}^2 &= \langle \kappa^{\mathbf{i}}(\gamma), \kappa^{\mathbf{i}}(\gamma) \rangle_{\mathcal{H}^{\otimes \mathbf{i}}} + \langle \kappa^{\mathbf{i}}(\eta), \kappa^{\mathbf{i}}(\eta) \rangle_{\mathcal{H}^{\otimes \mathbf{i}}} - 2 \langle \kappa^{\mathbf{i}}(\gamma), \kappa^{\mathbf{i}}(\eta) \rangle_{\mathcal{H}^{\otimes \mathbf{i}}} \end{aligned}$$

709 one gets the expected kernel trick statements of Theorem 2 and Theorem 3.

710 We are now interested in explicitly computing the expression  $\|\kappa_{k, \ell}^{(1,2)}(\gamma)\|_{\mathcal{H}_k^{\otimes 1} \otimes \mathcal{H}_{\ell}^{\otimes 2}}^2$ ,  $\|\kappa_k^{(2)}(\gamma) -$   
711  $\kappa_k^{(2)}(\eta)\|_{\mathcal{H}^{(1,1)}}^2$  and  $\|\kappa_k^{(3)}(\gamma) - \kappa_k^{(3)}(\eta)\|_{\mathcal{H}_k^{\otimes 3}}^2$ , and their corresponding V-statistics. Recall that for  
712 a (w.l.o.g.) symmetric, measurable function  $h(z_1, \dots, z_m)$ , the V-statistic of  $h$  with  $N$  samples  
713  $Z_1, \dots, Z_N$  is defined as

$$V(h; Z_1, \dots, Z_N) := N^{-m} \sum_{i_1, \dots, i_m=1}^N h(Z_{i_1}, \dots, Z_{i_m}).$$

714 Under fairly general conditions, the V-statistic converges in distribution to  $\mathbb{E}[h(Z_1, \dots, Z_m)]$  and a  
715 well-developed theory describes this convergence Van der Waart (2000); Serfling (1980); Arcones  
716 & Giné (1992).

717 **Example E.1** (Estimating  $\|\kappa_k^{(2)}(\gamma) - \kappa_k^{(2)}(\eta)\|_{\mathcal{H}^{(1,1)}}^2$ ). Let  $X, X', X'', X'''$  denote independent  
718 copies of  $\gamma$  and  $Y, Y', Y'', Y'''$  denote independent copies of  $\eta$ . The full expression for  $\|\kappa_k^{(2)}(\gamma) -$   
719  $\kappa_k^{(2)}(\eta)\|_{\mathcal{H}^{(1,1)}}^2$  is

$$\begin{aligned} \|\kappa_k^{(2)}(\gamma) - \kappa_k^{(2)}(\eta)\|_{\mathcal{H}^{(1,1)}}^2 &= \mathbb{E}k(X, X')k(X'', X''') + \mathbb{E}k(Y, Y')k(Y'', Y''') \\ &\quad + \mathbb{E}k(X, X')^2 + \mathbb{E}k(Y, Y')^2 \\ &\quad + 2\mathbb{E}k(X, Y)k(X', Y) + 2\mathbb{E}k(X, Y)k(X, Y') \\ &\quad - 2\mathbb{E}k(X, Y)k(X', Y') - 2\mathbb{E}k(X, Y)^2 \\ &\quad - 2\mathbb{E}k(X, X')k(X, X'') - 2\mathbb{E}k(Y, Y')k(Y, Y''). \end{aligned} \tag{12}$$

720 Given samples  $(x_i)_{i=1}^N, (y_i)_{i=1}^M$  from  $\gamma$  and  $\eta$  respectively the corresponding  $V$  statistic is

$$\begin{aligned}
& \frac{1}{N^4} \sum_{i,j,\kappa,l=1}^N k(x_i, x_j)k(x_\kappa, x_l) + \frac{1}{M^4} \sum_{i,j,\kappa,l=1}^M k(y_i, y_j)k(y_\kappa, y_l) \\
& + \frac{1}{N^2} \sum_{i,j=1}^N k(x_i, x_j)^2 + \frac{1}{M^2} \sum_{i,j=1}^M k(y_i, y_j)^2 \\
& + \frac{2}{N^2 M} \sum_{i,\kappa=1}^N \sum_{j=1}^M k(x_i, y_j)k(x_\kappa, y_j) + \frac{2}{N M^2} \sum_{i=1}^N \sum_{j,\kappa=1}^M k(x_i, y_j)k(x_i, y_\kappa) \\
& - \frac{2}{N^2 M^2} \sum_{i,l=1}^N \sum_{j,\kappa=1}^M k(x_i, y_j)k(x_\kappa, y_l) - \frac{2}{N M} \sum_{i=1}^N \sum_{j=1}^M k(x_i, y_j)^2 \\
& - \frac{2}{N^3} \sum_{i,j,\kappa=1}^N k(x_i, x_j)k(x_i, x_\kappa) - \frac{2}{M^3} \sum_{i,j,\kappa=1}^M k(y_i, y_j)k(y_i, y_\kappa).
\end{aligned} \tag{13}$$

721 Let us define the Gram matrices  $\mathbf{K}_x = [k(x_i, x_j)]_{i,j=1}^N \in \mathbb{R}^{N \times N}$ ,  $\mathbf{K}_y = [k(y_i, y_j)]_{i,j=1}^M \in \mathbb{R}^{M \times M}$ ,  
722  $\mathbf{K}_{x,y} = [k(x_i, y_j)]_{i,j=1}^{N,M}$  and let  $\mathbf{H}_N = \frac{1}{N} \mathbf{1}_N \mathbf{1}_N^\top \in \mathbb{R}^{N \times N}$ ,  $\mathbf{H}_M = \frac{1}{M} \mathbf{1}_M \mathbf{1}_M^\top \in \mathbb{R}^{M \times M}$  be the  
723 centering, then (13) can be rewritten as

$$\begin{aligned}
& \frac{1}{N^2} \text{Tr}(\mathbf{H}_N \mathbf{K}_x \mathbf{H}_N \mathbf{K}_x) + \frac{1}{M^2} \text{Tr}(\mathbf{H}_M \mathbf{K}_y \mathbf{H}_M \mathbf{K}_y) + \frac{1}{N^2} \text{Tr}(\mathbf{K}_x^2) + \frac{1}{M^2} \text{Tr}(\mathbf{K}_y^2) \\
& + \frac{2}{N M} \text{Tr}(\mathbf{K}_{xy} \mathbf{H}_N \mathbf{K}_{xy}) + \frac{2}{N M} \text{Tr}(\mathbf{K}_{xy} \mathbf{H}_M \mathbf{K}_{xy}^\top) - \frac{2}{N M} \text{Tr}(\mathbf{H}_M \mathbf{K}_{xy}^\top \mathbf{H}_N \mathbf{K}_{xy}) - \frac{2}{N M} \text{Tr}(\mathbf{K}_{xy}^2) \\
& - \frac{2}{N^2} \text{Tr}(\mathbf{K}_x \mathbf{H}_N \mathbf{K}_x) - \frac{2}{M^2} \text{Tr}(\mathbf{K}_y \mathbf{H}_M \mathbf{K}_y)
\end{aligned}$$

724 which simplifies to

$$\frac{1}{N^2} \text{Tr}[(\mathbf{K}_x(\mathbf{I} - \mathbf{H}_N))^2] + \frac{1}{M^2} \text{Tr}[(\mathbf{K}_y(\mathbf{I} - \mathbf{H}_M))^2] - \frac{2}{N M} \text{Tr}[\mathbf{K}_{xy}(\mathbf{I} - \mathbf{H}_M) \mathbf{K}_{xy}^\top (\mathbf{I} - \mathbf{H}_N)].$$

725 This estimator can be computed in quadratic time.

726 **Example E.2** (Estimating  $\|\kappa_{k,\ell}^{(1,2)}(\gamma)\|_{\mathcal{H}_k^{\otimes 1} \otimes \mathcal{H}_\ell^{\otimes 2}}^2$ ). Let  $k$  denote the kernel on  $\mathcal{X}_1$  and  $\ell$  denote the  
727 kernel on  $\mathcal{X}_2$ . Let  $(X, Y), (X', Y'), (X'', Y''), (X^{(3)}, Y^{(3)}), (X^{(4)}, Y^{(4)}), (X^{(5)}, Y^{(5)})$  denote in-  
728 dependent copies of  $\gamma \in \mathcal{P}(\mathcal{X}_1 \times \mathcal{X}_2)$ . The full expression for  $\|\kappa_{k,\ell}^{(1,2)}(\gamma)\|_{\mathcal{H}_k^{\otimes 1} \otimes \mathcal{H}_\ell^{\otimes 2}}^2$  is

$$\begin{aligned}
& \mathbb{E}k(X, X')\ell(Y, Y') - 4\mathbb{E}k(X, X')k(X, X'')\ell(Y, Y') \\
& - 2\mathbb{E}k(X, X')k(X, X')\ell(Y, Y'') + 4\mathbb{E}k(X, X')k(X, X'')\ell(Y, Y^{(3)}) \\
& + 2\mathbb{E}k(X, X')k(X'', X^{(3)})\ell(Y, Y') + 2\mathbb{E}k(X, X')k(X'', X^{(3)})\ell(Y, Y^{(3)}) \\
& + 4\mathbb{E}k(X, X')k(X'', X')\ell(Y, Y^{(3)}) + \mathbb{E}k(X, X')k(X, X')\ell(Y'', Y^{(3)}) \\
& - 8\mathbb{E}k(X, X')k(X'', X^{(3)})\ell(Y^{(4)}, Y') - 4\mathbb{E}k(X, X')k(X'', X')\ell(Y^{(4)}, Y^{(3)}) \\
& + 4\mathbb{E}k(X, X')k(X'', X^{(3)})\ell(Y^{(4)}, Y^{(5)}).
\end{aligned}$$

729 Given samples  $(x_i, y_i)_{i=1}^N$  from  $\gamma$  the corresponding  $V$ -statistic for this expression is

$$\begin{aligned}
& \frac{1}{N^2} \sum_{i,j=1}^N k(x_i, x_j)k(x_i, x_j)\ell(y_i, y_j) - \frac{4}{N^3} \sum_{i,j,\kappa=1}^N k(x_i, x_j)k(x_i, x_\kappa)\ell(y_i, y_j) \\
& - \frac{2}{N^3} \sum_{i,j,\kappa=1}^N k(x_i, x_j)k(x_i, x_j)\ell(y_i, y_\kappa) + \frac{4}{N^4} \sum_{i,j,\kappa,l=1}^N k(x_i, x_j)k(x_i, x_\kappa)\ell(y_i, y_l) \\
& + \frac{2}{N^4} \sum_{i,j,\kappa,l=1}^N k(x_i, x_j)k(x_\kappa, x_l)\ell(y_i, y_j) + \frac{2}{N^4} \sum_{i,j,\kappa,l=1}^N k(x_i, x_j)k(x_\kappa, x_l)\ell(y_i, y_l) \\
& + \frac{4}{N^4} \sum_{i,j,\kappa,l=1}^N k(x_i, x_j)k(x_\kappa, x_j)\ell(y_i, y_l) + \frac{1}{N^4} \sum_{i,j,\kappa,l=1}^N k(x_i, x_j)k(x_i, x_j)\ell(y_\kappa, y_l) \\
& - \frac{8}{N^5} \sum_{i,j,\kappa,l,m=1}^N k(x_i, x_j)k(x_\kappa, x_l)\ell(y_m, y_j) - \frac{4}{N^5} \sum_{i,j,\kappa,l,m=1}^N k(x_i, x_j)k(x_\kappa, x_j)\ell(y_m, y_l) \\
& + \frac{4}{N^6} \sum_{i,j,\kappa,l,m,n=1}^N k(x_i, x_j)k(x_\kappa, x_l)\ell(y_m, y_n).
\end{aligned}$$

730 Using the shorthand notation  $\mathbf{K} = \mathbf{K}_x, \mathbf{L} = \mathbf{L}_y$  and  $\mathbf{H} = \mathbf{H}_N$  and denoting by  $\circ$  the Hadamard  
731 product  $[\mathbf{A} \circ \mathbf{B}]_{i,j} = A_{i,j}B_{i,j}$  and  $\langle \cdot \rangle$  the sum over all elements of a matrix  $\langle \mathbf{A} \rangle = \sum_{i,j=1}^N A_{i,j}$ , the  
732  $V$ -statistic above can be written in the simpler form

$$\begin{aligned}
& \frac{1}{N^2} \left\langle \mathbf{K} \circ \mathbf{K} \circ \mathbf{L} - 4\mathbf{K} \circ \mathbf{K} \mathbf{H} \circ \mathbf{L} - 2\mathbf{K} \circ \mathbf{K} \circ \mathbf{L} \mathbf{H} \right. \\
& \quad + 4\mathbf{K} \mathbf{H} \circ \mathbf{K} \circ \mathbf{L} \mathbf{H} + 2\mathbf{K} \circ \mathbf{L} \left\langle \frac{\mathbf{K}}{N^2} \right\rangle + 2\mathbf{K} \mathbf{H} \circ \mathbf{H} \mathbf{K} \circ \mathbf{L} \\
& \quad + 4\mathbf{K} \circ \mathbf{H} \mathbf{K} \circ \mathbf{L} \mathbf{H} + \mathbf{K} \circ \mathbf{K} \left\langle \frac{\mathbf{L}}{N^2} \right\rangle - 8\mathbf{K} \circ \mathbf{L} \mathbf{H} \left\langle \frac{\mathbf{K}}{N^2} \right\rangle \\
& \quad \left. - 4\mathbf{K} \circ \mathbf{H} \mathbf{K} \left\langle \frac{\mathbf{L}}{N^2} \right\rangle + 4 \left\langle \frac{\mathbf{K}}{N^2} \right\rangle^2 \mathbf{L} \right\rangle.
\end{aligned}$$

733 Again this estimator can be computed in quadratic time.

734 **Example E.3** (Estimating  $\|\kappa_k^{(3)}(\gamma) - \kappa_k^{(3)}(\eta)\|_{\mathcal{H}_k^{\otimes 3}}^2$ ). In order to estimate  $d^{(3)}(\gamma, \eta)$  we note that  
735 one can write

$$\begin{aligned}
\|\kappa_k^{(3)}(\gamma) - \kappa_k^{(3)}(\eta)\|_{\mathcal{H}_k^{\otimes 3}}^2 &= \|\kappa_k^{(3)}(\gamma)\|_{\mathcal{H}_k^{\otimes 3}}^2 + \|\kappa_k^{(3)}(\eta)\|_{\mathcal{H}_k^{\otimes 3}}^2 \\
&\quad - 2\langle \kappa_k^{(3)}(\gamma), \kappa_k^{(3)}(\eta) \rangle_{\mathcal{H}_k^{\otimes 3}}.
\end{aligned}$$

736 We can estimate the first two terms like in Example E.2, and the third term can be expressed as

$$\begin{aligned}
\langle \kappa_k^{(3)}(\gamma), \kappa_k^{(3)}(\eta) \rangle_{\mathcal{H}_k^{\otimes 3}} &= \mathbb{E}k(X, Y)^3 - 3\mathbb{E}k(X, Y)^2k(X, Y')^2 \\
&\quad - 3\mathbb{E}k(X, Y)^2k(X', Y)^2 + 6\mathbb{E}k(X, Y)k(X, Y')k(X', Y) \\
&\quad + 3\mathbb{E}k(X, Y)^2k(X', Y') + 2\mathbb{E}k(X, Y)k(X', Y)k(X'', Y) \\
&\quad + 2\mathbb{E}k(X, Y)k(X, Y')k(X, Y'') - 6\mathbb{E}k(X, Y)k(X, Y')k(X', Y'') \\
&\quad - 6\mathbb{E}k(X, Y)k(X', Y)k(X'', Y') + 4\mathbb{E}k(X, Y)k(X', Y')k(X'', Y'').
\end{aligned}$$

737 For simplicity we will assume that we have an equal number of samples ( $N$ ) from both measures  
738  $(x_i)_{i=1}^N \in \gamma$  and  $(y_i)_{i=1}^N \in \eta$ . The V-statistic for  $\langle \kappa_k^{(3)}(\gamma), \kappa_k^{(3)}(\eta) \rangle_{\mathcal{H}_k^{\otimes 3}}$  can be expressed as

$$\begin{aligned} & \frac{1}{N^2} \sum_{i,j=1}^N k(x_i, y_j)^3 - \frac{3}{N^3} \sum_{i,j,\kappa=1}^N k(x_i, y_j)^2 k(x_i, y_\kappa) \\ & - \frac{3}{N^3} \sum_{i,j,\kappa=1}^N k(x_i, y_j)^2 k(x_\kappa, y_i) + \frac{6}{N^4} \sum_{i,j,\kappa,l=1}^N k(x_i, y_j) k(x_i, y_\kappa) k(x_l, y_j) \\ & + \frac{3}{N^4} \sum_{i,j,\kappa,l=1}^N k(x_i, y_j)^2 k(x_\kappa, y_l) + \frac{2}{N^4} \sum_{i,j,\kappa,l=1}^N k(x_i, y_j) k(x_\kappa, y_j) k(x_l, y_j) \\ & + \frac{2}{N^4} \sum_{i,j,\kappa,l=1}^N k(x_i, y_j) k(x_i, y_\kappa) k(x_l, y_l) - \frac{6}{N^5} \sum_{i,j,\kappa,l,m=1}^N k(x_i, y_j) k(x_i, y_\kappa) k(x_l, y_m) \\ & - \frac{6}{N^5} \sum_{i,j,\kappa,l,m=1}^N k(x_i, y_j) k(x_\kappa, y_j) k(x_l, y_m) + \frac{4}{N^6} \sum_{i,j,\kappa,l,m,n=1}^N k(x_i, y_j) k(x_\kappa, y_l) k(x_m, y_n). \end{aligned}$$

739 Using the notation  $\mathbf{K}_{xy} = [k(x_i, y_j)]_{i,j=1}^N$ , this estimator simplifies to

$$\begin{aligned} & \frac{1}{N^2} \left\langle \mathbf{K}_{xy} \circ \mathbf{K}_{xy} \circ \mathbf{K}_{xy} - 3\mathbf{K}_{xy} \circ \mathbf{K}_{xy} \circ \mathbf{H}\mathbf{K}_{xy} \right. \\ & \quad - 3\mathbf{K}_{xy} \circ \mathbf{K}_{xy} \circ \mathbf{K}_{xy}\mathbf{H} + 6\mathbf{K}_{xy} \circ \mathbf{K}_{xy}\mathbf{H} \circ \mathbf{H}\mathbf{K}_{xy} \\ & \quad + 3\mathbf{K}_{xy} \circ \mathbf{K}_{xy} \left\langle \frac{\mathbf{K}_{xy}}{N^2} \right\rangle + 2\mathbf{K}_{xy} \circ \mathbf{H}\mathbf{K}_{xy} \circ \mathbf{H}\mathbf{K}_{xy} \\ & \quad + 2\mathbf{K}_{xy} \circ \mathbf{K}_{xy}\mathbf{H} \circ \mathbf{K}_{xy}\mathbf{H} - 6\mathbf{K}_{xy} \circ \mathbf{K}_{xy}\mathbf{H} \left\langle \frac{\mathbf{K}_{xy}}{N^2} \right\rangle \\ & \quad \left. - 6\mathbf{K}_{xy} \circ \mathbf{H}\mathbf{K}_{xy} \left\langle \frac{\mathbf{K}_{xy}}{N^2} \right\rangle + 4 \left\langle \frac{\mathbf{K}}{N^2} \right\rangle^2 \mathbf{K}_{xy} \right\rangle. \end{aligned}$$

740 We mention also that the first two terms  $\|\kappa_k^{(3)}(\gamma)\|_{\mathcal{H}_k^{\otimes 3}}^2, \|\kappa_k^{(3)}(\eta)\|_{\mathcal{H}_k^{\otimes 3}}^2$  can be computed a little more  
741 simply than in Example E.2 since the expressions have more symmetry, using the notation  $\mathbf{K}_x =$   
742  $[k(x_i, x_j)]_{i,j=1}^N$  we can write down the V-statistic for  $\|\kappa_k^{(3)}(\gamma)\|_{\mathcal{H}_k^{\otimes 3}}^2$  as

$$\begin{aligned} & \frac{1}{N^2} \left\langle \mathbf{K}_x \circ \mathbf{K}_x \circ \mathbf{K}_x - 6\mathbf{K}_x \circ \mathbf{K}_x\mathbf{H} \circ \mathbf{K}_x \right. \\ & \quad + 4\mathbf{K}_x\mathbf{H} \circ \mathbf{K}_x \circ \mathbf{K}_x\mathbf{H} + 3\mathbf{K}_x \circ \mathbf{K}_x \left\langle \frac{\mathbf{K}_x}{N^2} \right\rangle \\ & \quad + 6\mathbf{K}_x\mathbf{H} \circ \mathbf{H}\mathbf{K}_x \circ \mathbf{K}_x - 12\mathbf{K}_x \circ \mathbf{H}\mathbf{K}_x \left\langle \frac{\mathbf{K}_x}{N^2} \right\rangle \\ & \quad \left. + 4 \left\langle \frac{\mathbf{K}_x}{N^2} \right\rangle^2 \mathbf{K}_x \right\rangle \end{aligned}$$

743 with a similar expression for  $\|\kappa_k^{(3)}(\eta)\|_{\mathcal{H}_k^{\otimes 3}}^2$ . The estimator can be computed in quadratic time.
